# Supplementary material
Source: PubMed Central journal article supplement (PMC10615350)

Supplemental Digital Content

eFigure 1

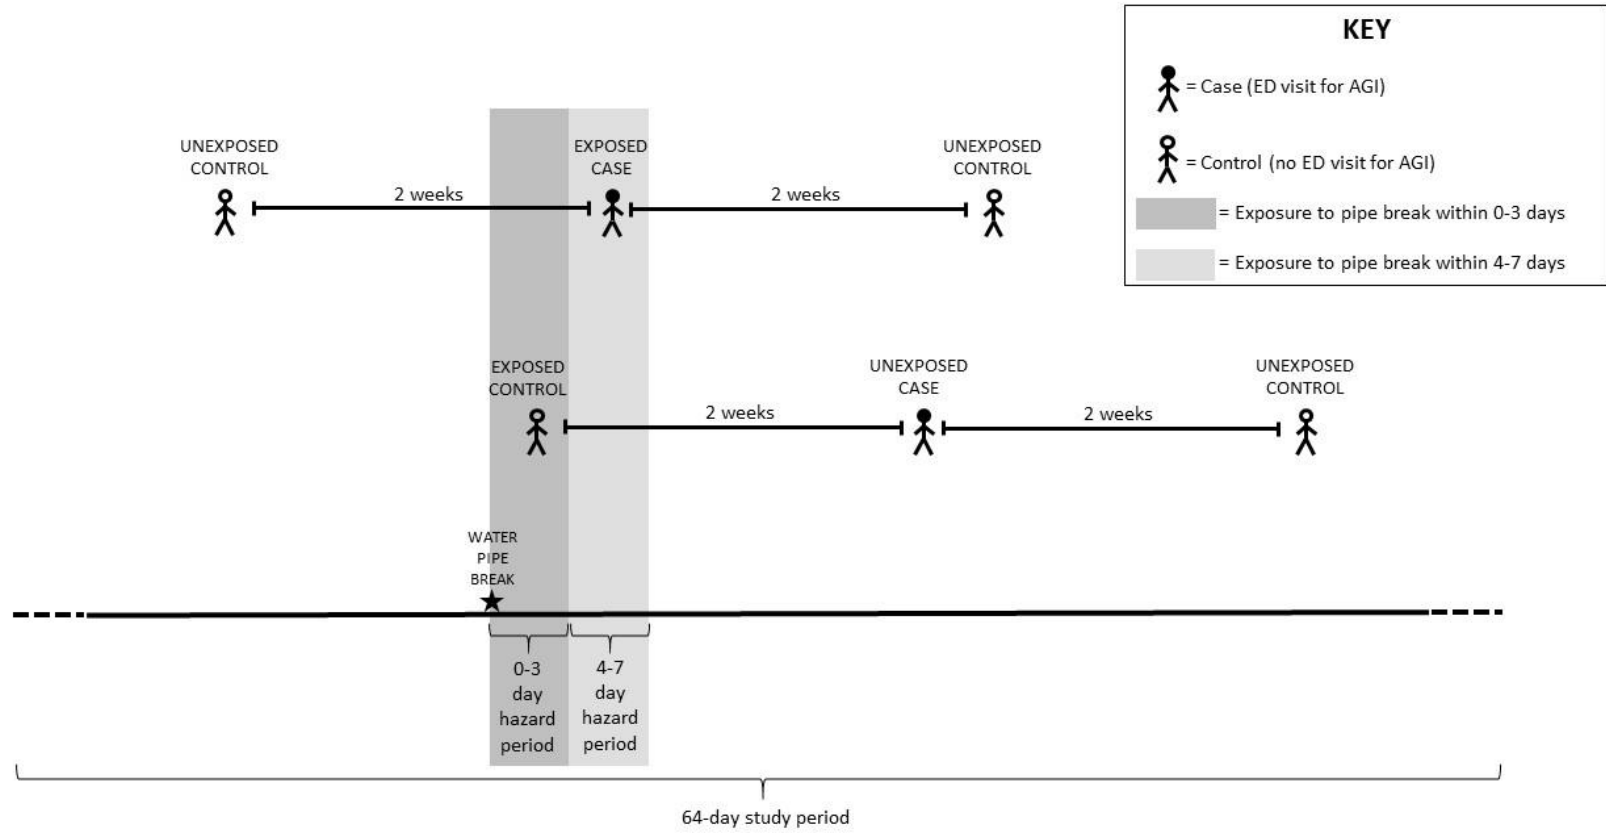

Supplement: NIHMS1917447-supplement-Supplemental_eFigure_1.pdf [file NIHMS1917447-supplement-Supplemental_eFigure_1.pdf]
